# Supplementary material for: Epigenetics of traumatic stress: The association of NR3C1 methylation and posttraumatic stress disorder symptom changes in response to narrative exposure therapy
Source: PubMed Central journal article supplement (PMC9852425; doi:10.1038/s41398-023-02316-6), 2023-01-19

## Supplemental Information

Epigenetics of traumatic stress: *NR3C1* methylation is associated with Posttraumatic Stress Disorder symptom changes in response to Narrative Exposure Therapy

**Supplemental Table 1:** Results of the repeated measurement correlation between *NR3C1* methylation and PTSD symptoms over the three points of measurement

| CpG site   | DF  | rmcorr | p       | FDR   |
|------------|-----|--------|---------|-------|
| cg25535999 | 299 | -0.195 | 0.00066 | 0.025 |
| cg19135245 | 299 | 0.13   | 0.02391 | 0.454 |
| cg19820298 | 297 | 0.11   | 0.05743 | 0.715 |
| cg16219186 | 299 | -0.095 | 0.09955 | 0.715 |
| cg24026230 | 299 | -0.091 | 0.11643 | 0.715 |
| cg03906910 | 299 | -0.088 | 0.12709 | 0.715 |
| cg19645279 | 299 | -0.087 | 0.13164 | 0.715 |
| cg20753294 | 299 | -0.072 | 0.21223 | 0.945 |
| cg18998365 | 299 | -0.07  | 0.22385 | 0.945 |
| cg18019515 | 299 | 0.066  | 0.25266 | 0.946 |
| cg13764763 | 299 | 0.063  | 0.27381 | 0.946 |
| cg15910486 | 299 | 0.056  | 0.33508 | 0.995 |
| cg26464411 | 299 | 0.047  | 0.41702 | 0.995 |
| cg00629244 | 299 | 0.047  | 0.41777 | 0.995 |
| cg19176661 | 299 | -0.042 | 0.47231 | 0.995 |
| cg12466613 | 299 | -0.04  | 0.48884 | 0.995 |
| cg05483455 | 299 | 0.037  | 0.52043 | 0.995 |
| cg15115787 | 299 | 0.037  | 0.52292 | 0.995 |
| cg20728768 | 299 | -0.034 | 0.55961 | 0.995 |
| cg08818984 | 299 | -0.031 | 0.5884  | 0.995 |
| cg03746860 | 299 | -0.031 | 0.58941 | 0.995 |
| cg07589972 | 299 | 0.027  | 0.63937 | 0.995 |
| cg17342132 | 299 | -0.026 | 0.65512 | 0.995 |
| cg23776787 | 299 | 0.022  | 0.7043  | 0.995 |
| cg08845721 | 299 | 0.021  | 0.71542 | 0.995 |
| cg12969488 | 299 | -0.015 | 0.79622 | 0.995 |
| cg24052866 | 299 | -0.014 | 0.80583 | 0.995 |
| cg12888360 | 299 | -0.014 | 0.80962 | 0.995 |
| cg18718518 | 299 | 0.011  | 0.84796 | 0.995 |
| cg00294552 | 298 | 0.01   | 0.8689  | 0.995 |
| cg07733851 | 299 | 0.008  | 0.8956  | 0.995 |
| cg17860381 | 299 | -0.007 | 0.90933 | 0.995 |
| cg08423118 | 299 | -0.005 | 0.93106 | 0.995 |
| cg23430507 | 299 | 0.003  | 0.96527 | 0.995 |
| cg22233604 | 299 | 0.001  | 0.98155 | 0.995 |
| cg08695103 | 299 | 0.001  | 0.98219 | 0.995 |
| cg03857453 | 299 | -0.001 | 0.99108 | 0.995 |
| cg01967637 | 299 | 0      | 0.99473 | 0.995 |

**Notes:** DF, Degrees of Freedom; rmcorr, Repeated Measurement Correlation; p, p-value; FDR, FDR-corrected p-value

**Supplemental Figure 1:** Scatterplot of Repeated Measurement Correlation (rmcorr) between PTSD symptom severity (PDS score) and methylation at *NR3C1* cg25535999 for each individual included in the treatment study. The three points of measurement for each individual are visualized in the same color, along with individual regression lines (assuming a random intercept and a fixed slope). PDS, Posttraumatic Diagnostic Scale.

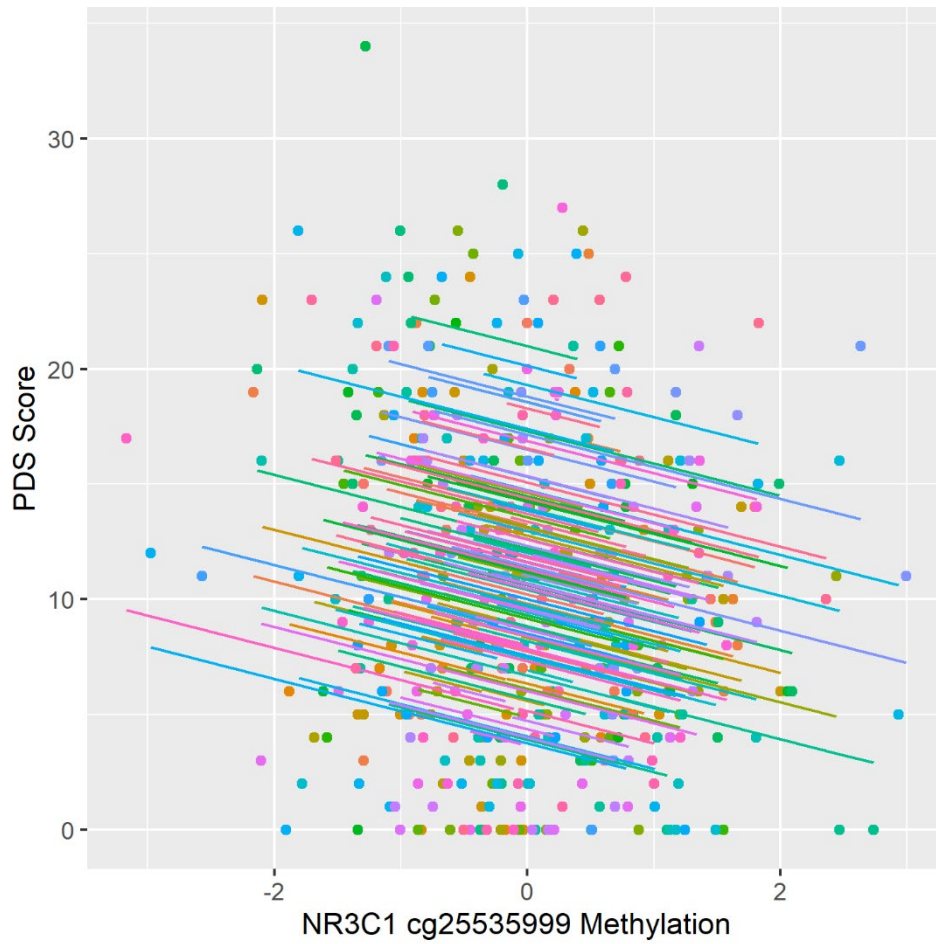

**Supplemental Figure 2:** The figure shows detailed chromosomal distribution of the *NR3C1* gene region in the SMART genome browser. The upper panel depicts the known Ensembl transcripts from the *NR3C1* gene locus, with transcript, exon, CDS and UTR regions marked red, blue, orange and green color, respectively. The yellow arrow marks the direction of transcription. The lower panel depicts the *NR3C1* gene locus with the locations of the Infinium CpG probes. DNA methylation at the encircled CpG site cg25535999 was significantly associated with PTSD symptoms over time, after accounting for multiple comparisons. CpG sites at density regions Island, N-shore, S-shore, N-shelf, S-shelf and NA are marked in red, orange, violet, blue, green and grey respectively.

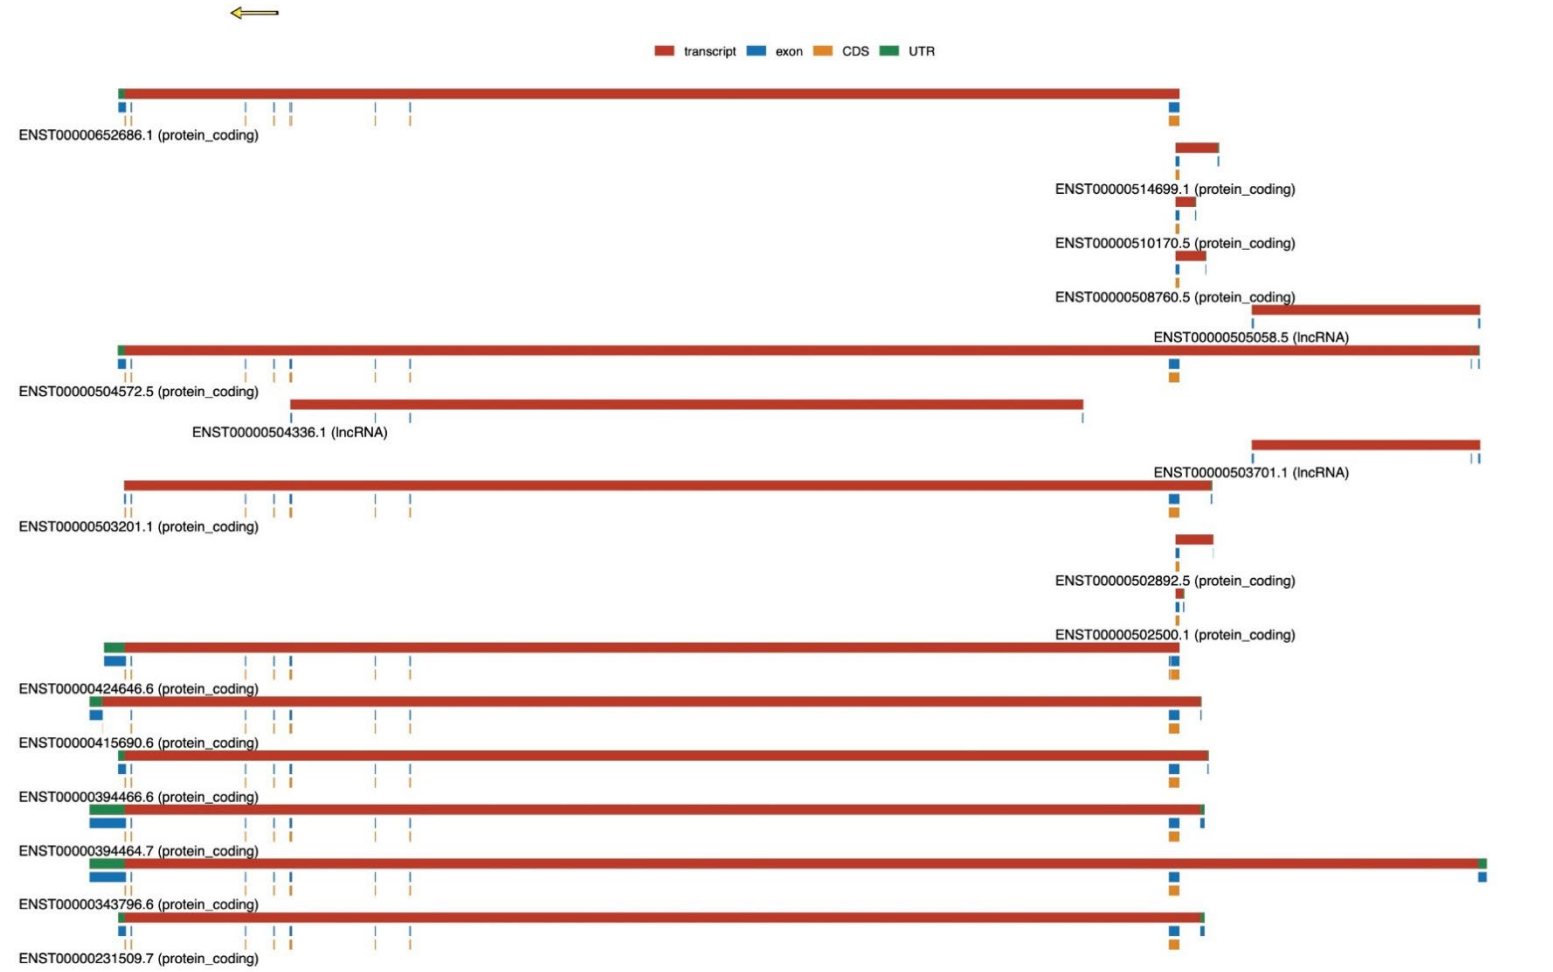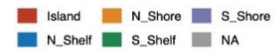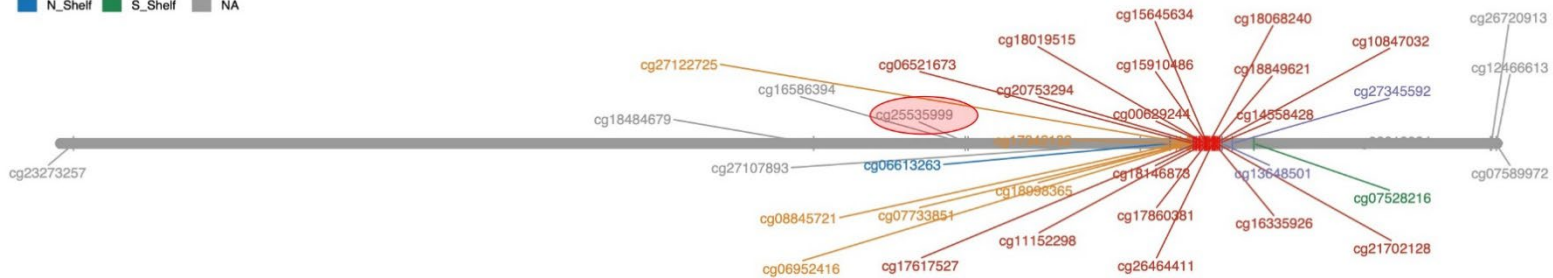

**Supplemental Figure 3:** Correlation between *NR3C1* cg25535999 methylation and *NR3C1* expression across different TCGA datasets.

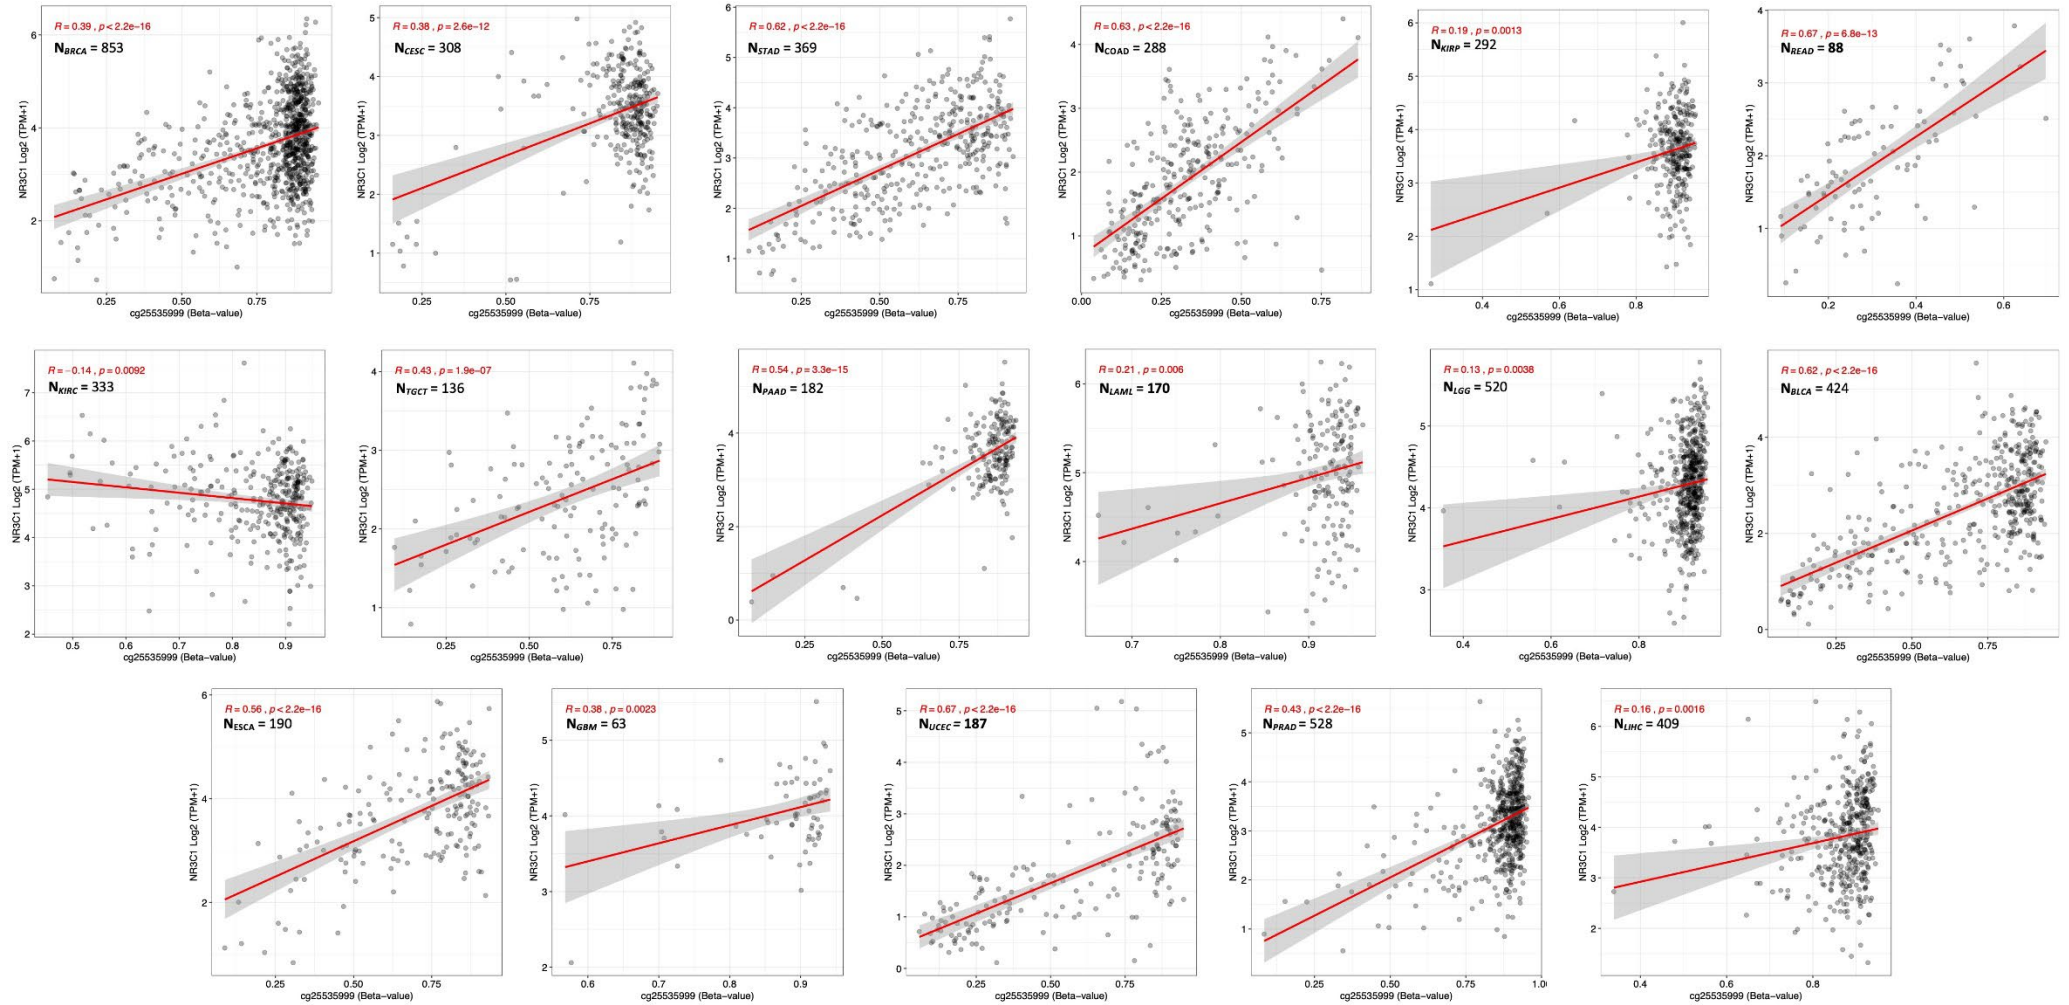

Supplement: 41398_2023_2316_MOESM1_ESM.pdf [file 41398_2023_2316_MOESM1_ESM.pdf]
